# Supplementary material for: Rhodoliths holobionts in a changing ocean: host-microbes interactions mediate coralline algae resilience under ocean acidification
Source: BMC Genomics. 2018 Sep 24;19:701. doi: 10.1186/s12864-018-5064-4 (PMC6154897; doi:10.1186/s12864-018-5064-4)
Supplement: Supplementary file 1 — General features of metagenomes. (XLS 45 kb) [file 12864_2018_5064_MOESM1_ESM.xls]

## Sheet: Sheet1
MG-Rast Id	Sample	Treatment	#reads	Reads lengh average (bp)	GC content average	Classified by MG-Rast (Subsystem)	(%)	Classified by MG-Rast (Genbank)	(%)	Tax_Domain Bacteria (%)	Tax_Domain Archaea (%)	Tax_Domain Eukaryota (%)	Tax_Others (%)
4.58517e+06	T1-050814_water	Live treat_ambient air_day 0	55341	114 ± 44	53 ± 9 %	19256	34.7952	14413	26.044	98.3695	0.256713	0.957469	0.416291
4.58517e+06	T1-050914_water	Live treat_ambient air_day 1	164312	115 ± 44	56 ± 8 %	79804	48.5686	60897	37.0618	99.2512	0.0952428	0.384255	0.269307
4.58517e+06	T1-051514_water	Live treat_ambient air_day 7	474333	159 ± 44	48 ± 10 %	367750	77.5299	280025	59.0355	98.8637	0.244978	0.627801	0.263548
4.58517e+06	T1-061714_water	Live treat_ambient air_day 40	67442	171 ± 43	45 ± 12 %	44611	66.1472	35396	52.4836	97.4065	0.762798	0.824952	1.00576
4.58517e+06	T2-050814_water	Dead treat_high pCO2_day 0	106027	112 ± 44	52 ± 9 %	33798	31.8768	28807	27.1695	97.6881	0.197869	0.978929	1.13514
4.58517e+06	T2-050914_water	Dead treat_high pCO2_day 1	139354	119 ± 45	54 ± 8 %	81962	58.8157	60149	43.1627	99.2701	0.116378	0.289282	0.324195
4.58517e+06	T2-051514_water	Dead treat_high pCO2_day 7	977776	109 ± 41	53 ± 9 %	580363	59.3554	451031	46.1283	99.2639	0.0953371	0.452075	0.188679
4.58518e+06	T2-061614_water	Dead treat_high pCO2_day 40	882435	118 ± 45	51 ± 9 %	495831	56.189	367473	41.6431	98.7205	0.210083	0.691207	0.378259
4.58518e+06	T3-050814_water	Live treat_high pCO2_day 0	380572	109 ± 41	51 ± 10 %	184672	48.5249	141486	37.1772	99.0819	0.127928	0.558359	0.231825
4.58518e+06	T3-050914_water	Live treat_high pCO2_day 1	374968	117 ± 45	55 ± 9 %	192725	51.3977	151942	40.5213	99.0358	0.134262	0.449514	0.380408
4.58518e+06	T3-051514_water	Live treat_high pCO2_day 7	1123625	112 ± 42	53 ± 9 %	613457	54.5962	474019	42.1866	99.1142	0.152315	0.461585	0.27193
4.58518e+06	T3-061714_water	Live treat_high pCO2_day 40	972571	119 ± 45	50 ± 10 %	610057	62.7262	452733	46.5501	98.7768	0.200118	0.653807	0.369313
4.58518e+06	T4-050814_water	Dead treat_ambient air_day 0	56832	119 ± 44	52 ± 8 %	21020	36.9862	15594	27.4388	98.6726	0.179556	0.763114	0.384763
4.58518e+06	T4-050914_water	Dead treat_ambient air_day 1	1021148	121 ± 46	55 ± 8 %	604514	59.1995	493857	48.3629	99.1911	0.141944	0.377235	0.28976
4.58518e+06	T4-051514_water	Dead treat_ambient air_day 7	411250	147 ± 48	46 ± 10 %	271622	66.0479	203231	49.4179	98.8225	0.242581	0.502876	0.432021
4.58518e+06	T4-061614_water	Dead treat_ambient air_day 40	37803	131 ± 49	52 ± 9 %	10980	29.0453	8736	23.1093	97.6076	0.343407	1.32784	0.721154
4.58744e+06	T1A-0509_microbiome	Live rhod (a)_ambient air_day 1	568055	241 ± 64	50 ± 10 %	109255	19.2332	99295	17.4798	75.1055	1.79667	22.7967	0.301123
4.58744e+06	T1A-0612_microbiome	Live rhod (a)_ambient air_day 40	905258	235 ± 63	50 ± 10 %	171316	18.9245	160271	17.7045	76.8798	1.9467	20.8659	0.307604
4.58744e+06	T1B-0509_microbiome	Live rhod (b)_ambient air_day 1	864468	233 ± 59	48 ± 11 %	144073	16.6661	137055	15.8543	75.1552	1.19879	23.3512	0.294772
4.58744e+06	T1B-0612_microbiome	Live rhod (b)_ambient air_day 40	704817	244 ± 65	52 ± 10 %	163898	23.254	154862	21.9719	78.9503	1.39608	19.4179	0.235694
4.58745e+06	T2A-0509_microbiome	Dead rhod_high pCO2_day 1	685015	244 ± 66	44 ± 8 %	436498	63.7209	340363	49.6869	96.5792	0.0802085	3.15457	0.185978
4.58745e+06	T2A-0612_microbiome	Dead rhod_high pCO2_day 40	474435	244 ± 65	50 ± 11 %	263482	55.536	216159	45.5614	95.6088	0.288214	3.84439	0.258606
4.58745e+06	T3A-0509_microbiome	Live rhod (a)_high pCO2_day 1	747294	236 ± 65	50 ± 10 %	125284	16.765	120843	16.1707	69.0309	1.11219	29.6062	0.250739
4.58745e+06	T3A-0612_microbiome	Live rhod (a)_high pCO2_day 40	1273115	233 ± 62	47 ± 10 %	140359	11.0248	144577	11.3562	63.4243	1.34185	34.9226	0.311253
4.58745e+06	T3B-0509_microbiome	Live rhod (b)_high pCO2_day 1	969678	235 ± 64	51 ± 10 %	199471	20.5708	187614	19.3481	75.3771	0.972742	23.4108	0.239321
4.58745e+06	T3B-0612_microbiome	Live rhod (b)_high pCO2_day 40	992713	237 ± 61	50 ± 10 %	172132	17.3396	164335	16.5541	71.7905	1.60404	26.362	0.243405
4.58745e+06	T4A-0509_microbiome	Dead rhod_ambient air_day 1	387119	239 ± 66	45 ± 9 %	259974	67.1561	199615	51.5642	97.0002	0.0746437	2.77785	0.147284
4.58745e+06	T4A-0612_microbiome	Dead rhod_ambient air_day 40	499743	241 ± 66	50 ± 11 %	297376	59.5058	241687	48.3623	97.2464	0.290045	2.28146	0.182054
