# Supplementary material for: Rhodoliths holobionts in a changing ocean: host-microbes interactions mediate coralline algae resilience under ocean acidification
Source: BMC Genomics. 2018 Sep 24;19:701. doi: 10.1186/s12864-018-5064-4 (PMC6154897; doi:10.1186/s12864-018-5064-4)
Supplement: Supplementary file 5 — Average water chemistry in treatment tanks. (XLS 28 kb) [file 12864_2018_5064_MOESM5_ESM.xls]

## Sheet: Sheet1
Treatment [Target]	pH	pCO2 [matm]	Temp [oC]	AT [mmol/kg SW]	CI [mmol/kg SW]	WCa	WAr
Live rhod_ambient air	7.97 (0.05)	483.78 (59)	15	2307.51 (124)	2128.92 (117)	2.34 (0.41)	1.50 (0.26)
Live rhod_ high pCO2	7.54 (0.14)	1429.58 (99)	15	2273.68 (154)	2248.95 (155)	1.67 (0.92)	1.07 (0.23)
Dead rhod_ambient air	7.97 (0.04)	491.36 (53)	15	2349.40 (186)	2168.91 (181)	2.48 (0.14)	1.37 (0.09)
Dead rhod_ high pCO2	7.53 (0.09)	1593.35 (140)	15	2523.90 (164)	2498.09 (162)	1.83 (0.30)	1.17 (0.19)
